# Supplementary material for: Esterase Activity of Serum Albumin Studied by 1H NMR Spectroscopy and Molecular Modelling
Source: MDPI journal article supplement (doi:10.3390/ijms221910593), 2021-09-30
Supplement: s1 [file s1]

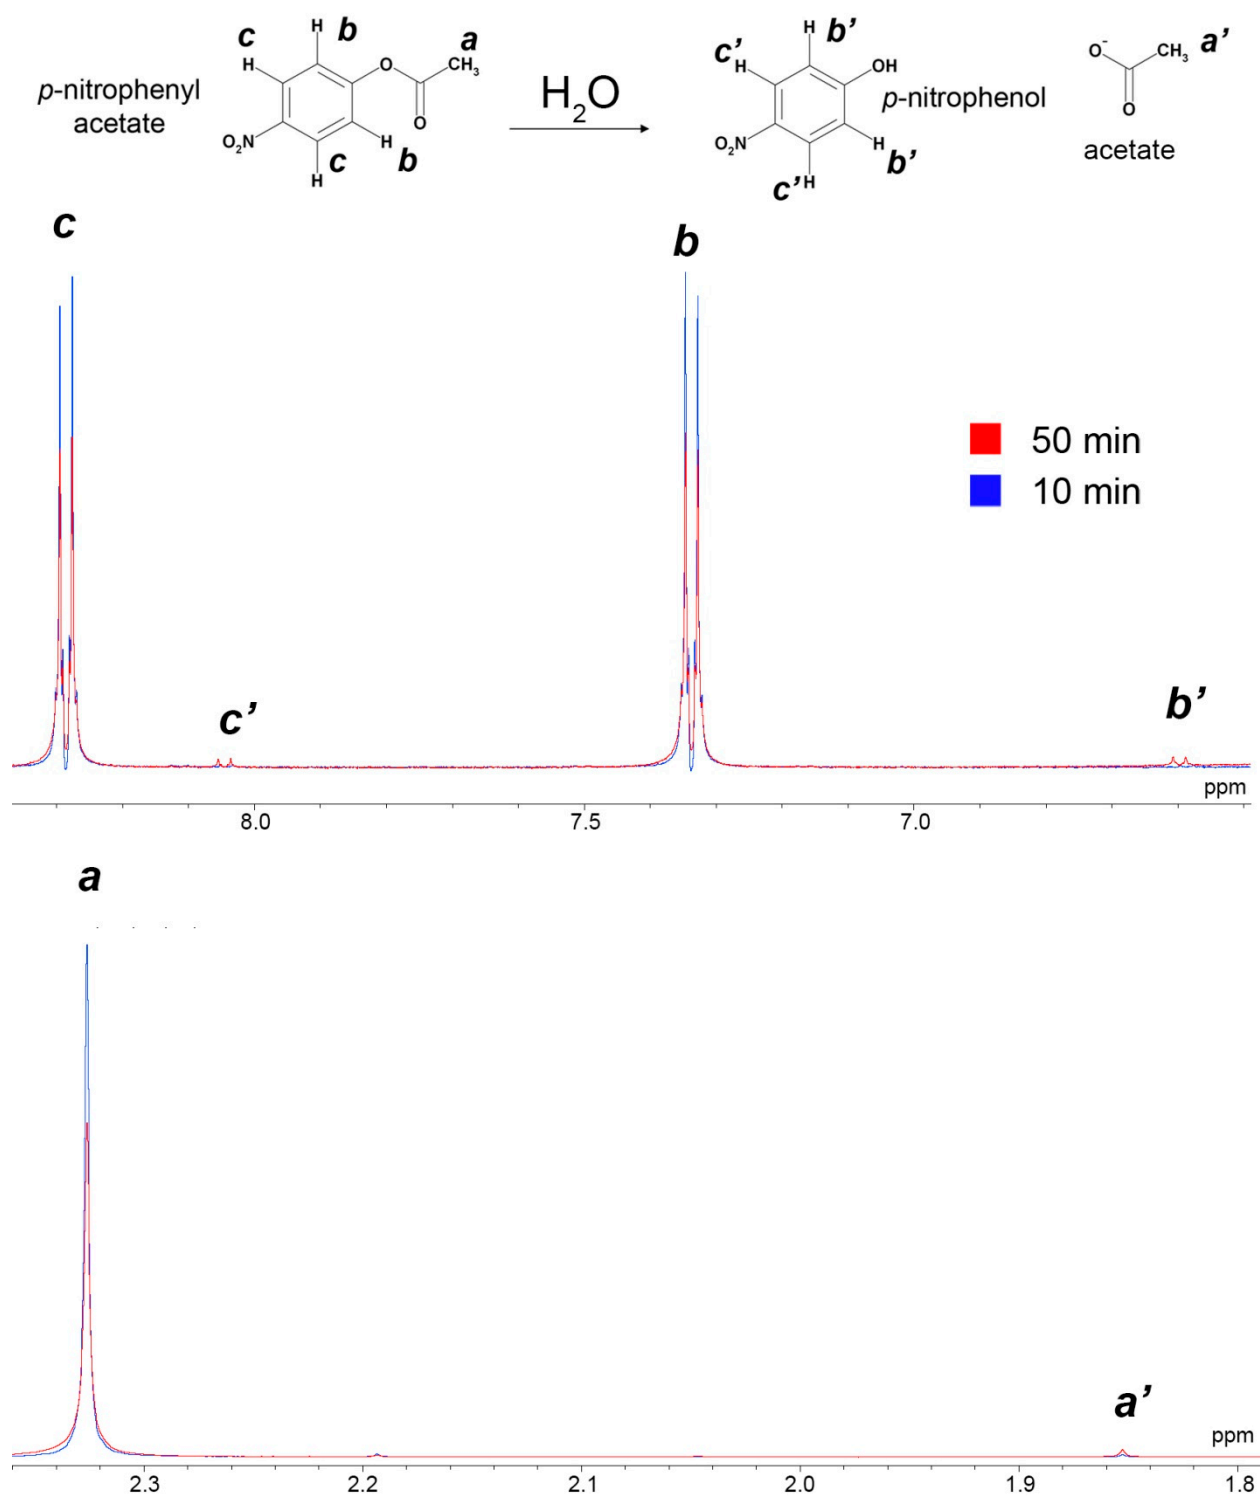

**Figure S1.** Kinetics of spontaneous hydrolysis of *p*-nitrophenyl acetate (NPA) according to  $^1H$  NMR data: aromatic part of the spectrum (top) and aliphatic part of the spectrum (bottom).

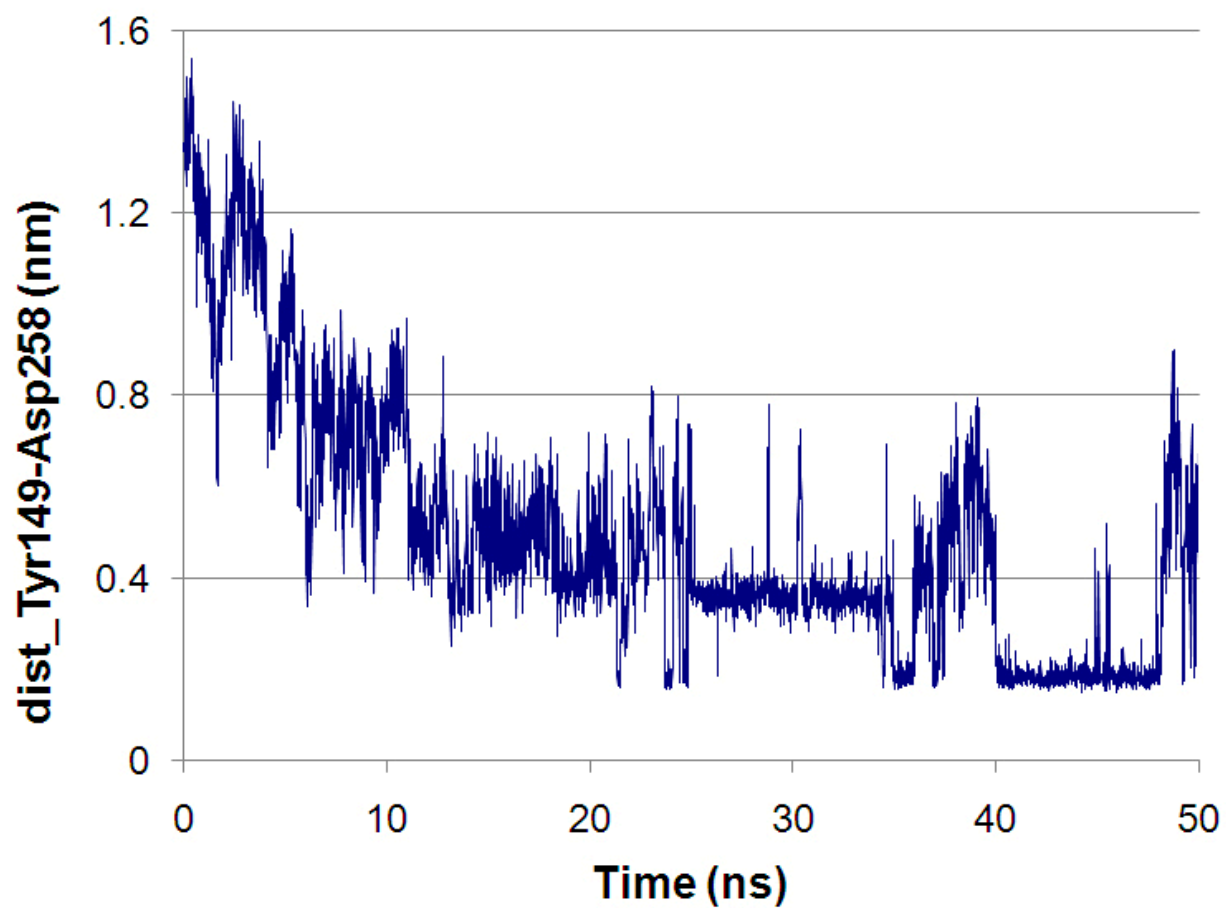

**Figure S2.** Time change of the distance (dist\_Tyr149-Asp258) between the hydroxyl oxygen atom of catalytic tyrosine Tyr149 and atom O $\delta$ 1 of Asp258 of bovine serum albumin.
